# Supplementary material for: A series of bimetallic ammonium RbEu nitrates exhibiting switchable dielectric constant and photoluminescence properties
Source: Royal Society of Chemistry journal article supplement (doi:10.1039/d4tc01910e), 2024-01-01
Supplement: d4tc01910e1.pdf [file d4tc01910e1.pdf]

## Supporting Information

# A Series of Bimetallic Ammonium RbEu Nitrates Exhibiting Switchable Dielectric Constant and Photoluminescence Properties†

Hua-Kai Li, Li-Ping Wang, Zong-Ze Cui, Qi Xu, Liang-Liang Zou, Na Wang, Le-Ping

Miao, Heng-Yun Ye,\* and Chao Shi\*

Chaotic Matter Science Research Center, International Institute for Innovation, Jiangxi  
University of Science and Technology, Nanchang 330000, Jiangxi Province, P.R. China.

\*Foundation Item: National Natural Science Foundation of China (No. 22175079 and  
22275075) and Natural Science Foundation of Jiangxi Province (No. 20225BCJ23006,  
20224ACB204002 and 20204BCJ22015).

*E-mail address:* 15150517670@163.com

*Tel.:* 0791-83858326

## More characterizations

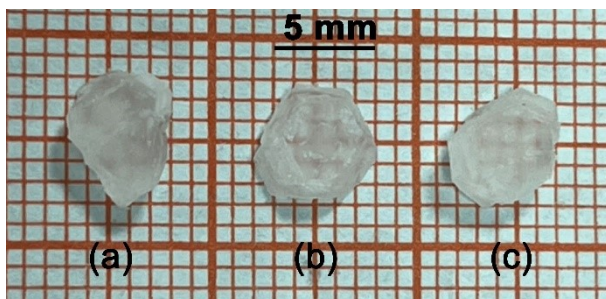

**Fig S1.** The macroscopic shape of the single crystal of crystal (a) **1**, (b) **2** and (c) **3**.

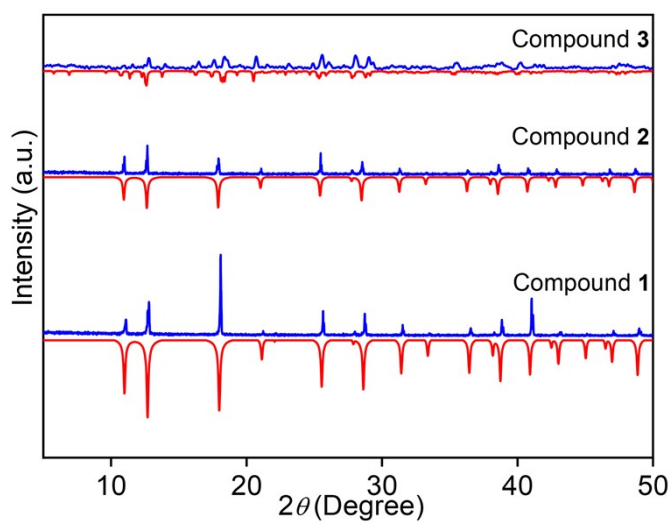

**Fig S2.** The powder X-ray diffraction (PXRD) patterns for **1–3** measured at room temperature. Notes: blue lines (Measurement); red lines (Simulation).

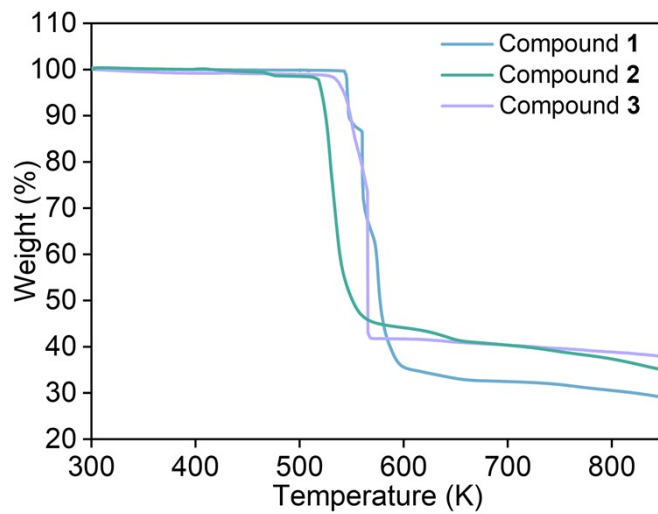

**Fig S3.** The thermogravimetric (TG) curves of 1–3.

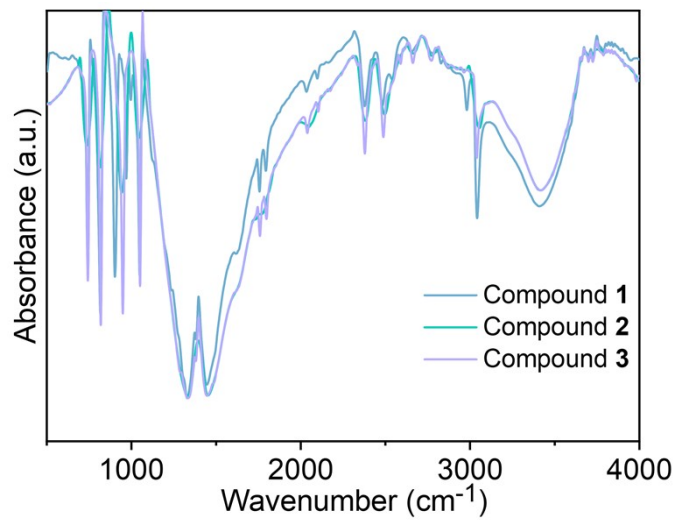

**Fig S4.** FTIR spectra of 1–3.

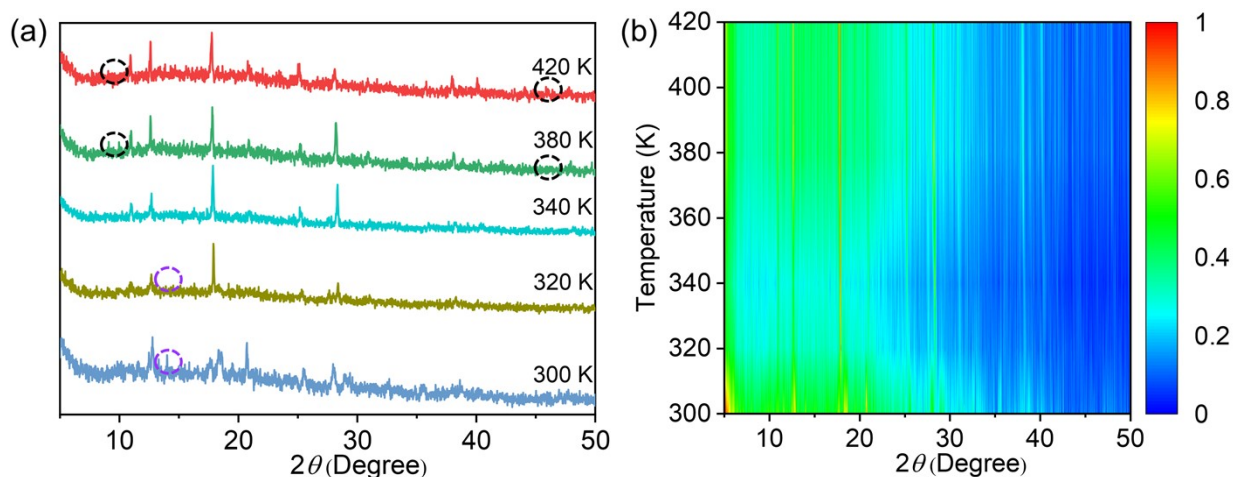

**Fig. S5.** (a) Variable-temperature PXRD spectra of **3** collected on cooling mode. (b) False-color maps extracted at 5–50° intervals of the temperature-variable PXRD pattern.

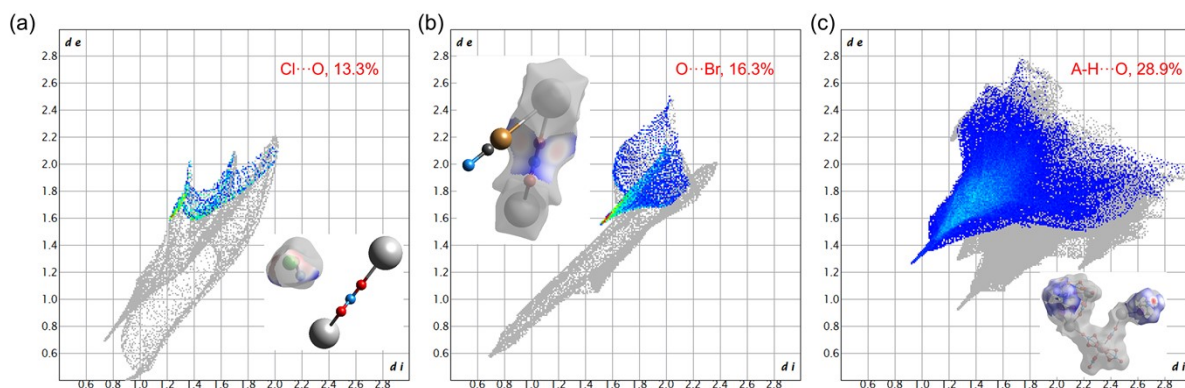

**Fig S6.** Hirshfeld surface analysis of (a) Cl, (b) Br and (c) I atoms substitutions, interaction forces between organic cations and nitric radicals. Red, white and blue regions of the Hirshfeld surfaces correspond to positive (close contact), neutral and negative isoenergies, respectively. In the fingerprint plots,  $d_i$  and  $d_e$  denote the distances to the nearest atom inside and outside of the Hirshfeld surface, respectively.

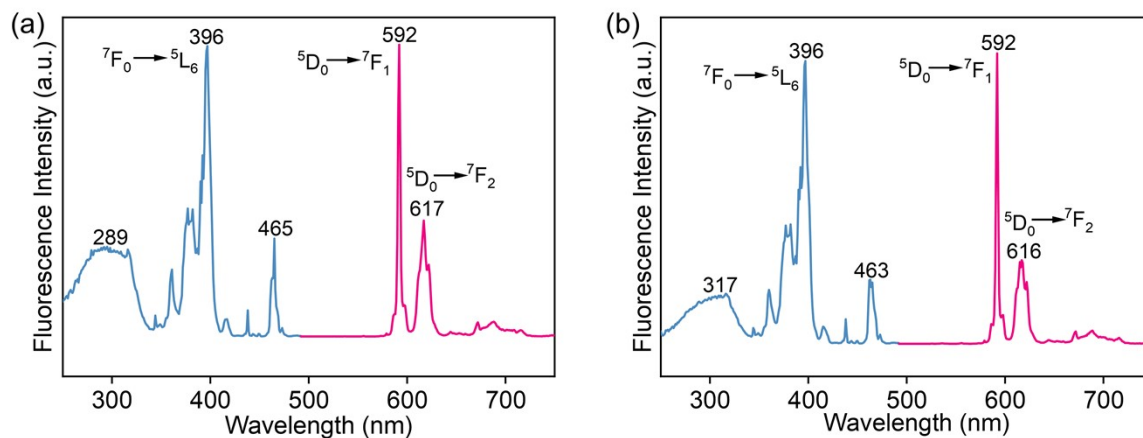

**Fig S7.** The photoluminescence properties of **2** and **3** at room temperature. Emission ( $\lambda_{\text{exc}} = 396 \text{ nm}$ ) and excitation ( $\lambda_{\text{em}} = 592 \text{ nm}$ ) spectra of (a) **2** and (b) **3**. Notes: the red and blue lines represent emission and excitation spectra, respectively.

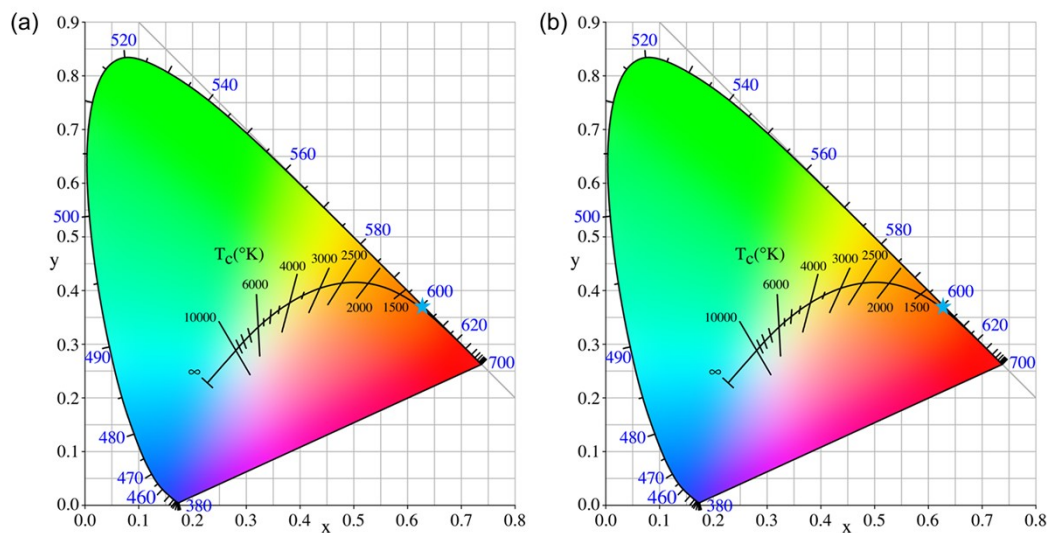

**Fig S8.** CIE chromaticity diagram of (a) **2** and (b) **3** polycrystalline phosphors excited by UV light.

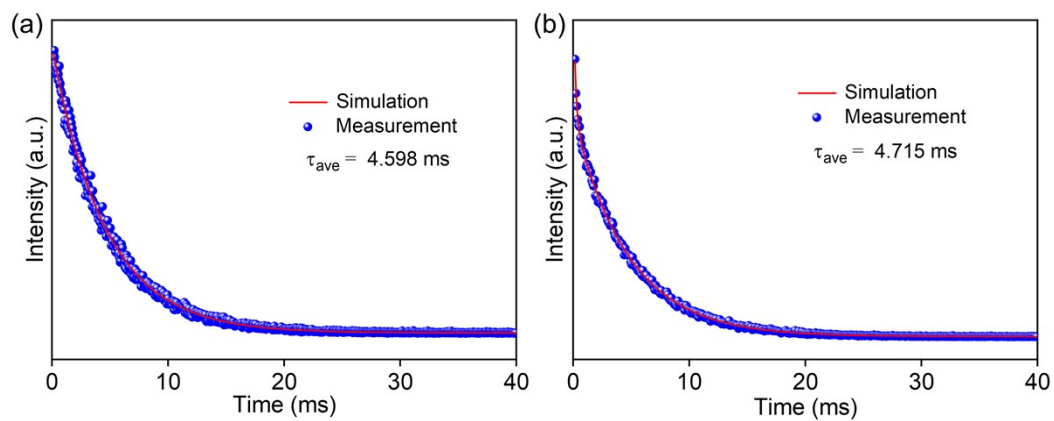

**Fig S9.** Photoluminescence decay lifetime curves of (a) **2** and (b) **3**.

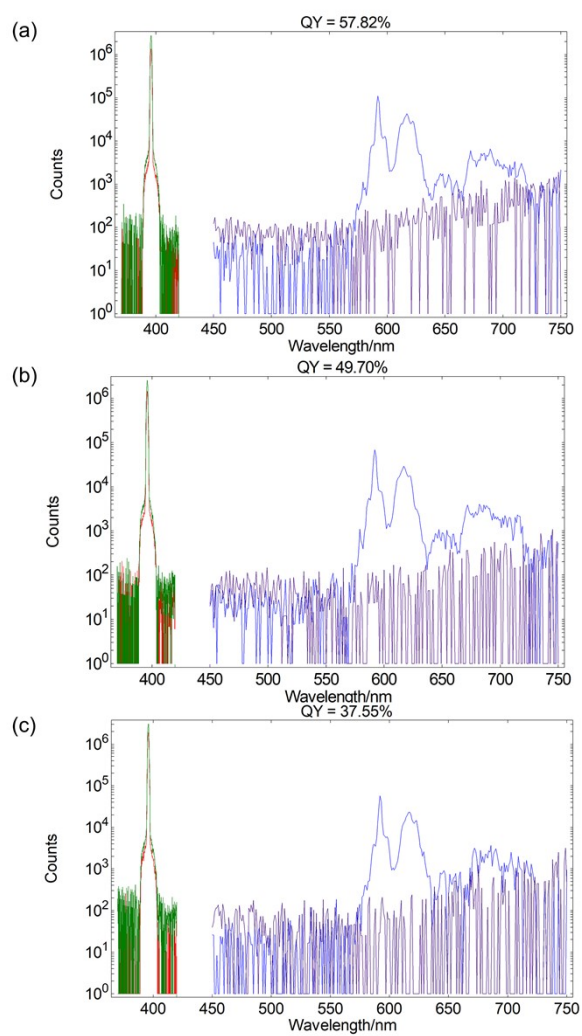

**Fig S10.** The FQY of (a) **1**, (b) **2** and (c) **3**.

**Table S1.** The averaged enthalpy changes and corresponding entropy changes in **1–3**. Using the Boltzmann equation,  $\Delta S = R \cdot \ln N$ , the  $N$  value of **1–3** is estimated.

| Compound                                           | <b>1</b> | <b>2</b> | <b>3</b> |
|----------------------------------------------------|----------|----------|----------|
| $\Delta H$ (kJ·mol <sup>-1</sup> )                 | 8.7989   | 12.0577  | 9.1380   |
| $\Delta S$ (J·mol <sup>-1</sup> ·K <sup>-1</sup> ) | 34.8472  | 43.6084  | 28.1517  |
| $N$                                                | 66.1145  | 189.6493 | 29.5493  |

**Table S2.** Comparison of structural phase transition temperatures of rare-earth double perovskite materials.

| Formula <sup>a</sup>                                                                                   | $T/K$            | Ref           |
|--------------------------------------------------------------------------------------------------------|------------------|---------------|
| (DMP) <sub>2</sub> LaRb(NO <sub>3</sub> ) <sub>6</sub>                                                 | 219/209          | 1             |
| (HQ) <sub>2</sub> RbEu(NO <sub>3</sub> ) <sub>6</sub>                                                  | 254/245          | 2             |
| [(CH <sub>3</sub> ) <sub>3</sub> NCH <sub>2</sub> Cl] <sub>2</sub> RbEu(NO <sub>3</sub> ) <sub>6</sub> | 259/246          | This work (1) |
| (HQ) <sub>4</sub> KEu(NO <sub>3</sub> ) <sub>8</sub>                                                   | 263/259, 292/290 | 3             |
| (RM3HQ) <sub>2</sub> RbPr(NO <sub>3</sub> ) <sub>6</sub>                                               | 280/279          | 4             |
| (RM3HQ) <sub>2</sub> RbLa(NO <sub>3</sub> ) <sub>6</sub>                                               | 280/269, 425/409 | 5             |
| [(CH <sub>3</sub> ) <sub>3</sub> NCH <sub>2</sub> Br] <sub>2</sub> RbEu(NO <sub>3</sub> ) <sub>6</sub> | 281/272          | This work (2) |
| (RM3HQ) <sub>2</sub> RbCe(NO <sub>3</sub> ) <sub>6</sub>                                               | 285/272          | 6             |
| (RM3HQ) <sub>2</sub> RbEu(NO <sub>3</sub> ) <sub>6</sub>                                               | 285/279          | 7             |
| (R3HQ) <sub>4</sub> KCe(NO <sub>3</sub> ) <sub>8</sub>                                                 | 323/306          | 8             |
| [(CH <sub>3</sub> ) <sub>3</sub> NCH <sub>2</sub> I] <sub>2</sub> RbEu(NO <sub>3</sub> ) <sub>6</sub>  | 327/310, 405/377 | This work (3) |
| (RM3HQ) <sub>2</sub> KEu(NO <sub>3</sub> ) <sub>6</sub>                                                | 371/363          | 9             |
| (R3HQ) <sub>4</sub> CsEu(NO <sub>3</sub> ) <sub>8</sub>                                                | 375/359          | 10            |
| (R3HQ) <sub>4</sub> CsSm(NO <sub>3</sub> ) <sub>8</sub>                                                | 379/358          | 10            |
| (4FHQ) <sub>2</sub> RbEu(NO <sub>3</sub> ) <sub>6</sub>                                                | 432/418          | 2             |
| (3HQ) <sub>4</sub> RbEu(NO <sub>3</sub> ) <sub>8</sub>                                                 | 442/434          | 11            |

<sup>a</sup> DMP = *N,N*-dimethylpyrrolidinium cation; HQ = quinuclidium; RM3HQ = (*R*)-*N*-methyl-3-hydroxylquinuclidinium; R3HQ = (*R*)-3-hydroxylquinuclidinium cation; 4FHQ = 4-fluoro-quinuclidium.

**Table S3.** Crystal data and structure refinement details of **1**, **2** and **3**.

| <b>1</b>       | 193 K                                                                              | 293 K                                                                                           |
|----------------|------------------------------------------------------------------------------------|-------------------------------------------------------------------------------------------------|
| Formula        | C <sub>8</sub> H <sub>22</sub> Cl <sub>2</sub> EuN <sub>8</sub> O <sub>18</sub> Rb | C <sub>16</sub> Cl <sub>4</sub> Eu <sub>2</sub> N <sub>16</sub> O <sub>36</sub> Rb <sub>2</sub> |
| Formula weight | 826.68                                                                             | 1608.94                                                                                         |
| $T / K$        | 192.97(10)                                                                         | 293(2)                                                                                          |

|                                                                                                                    |                |                |
|--------------------------------------------------------------------------------------------------------------------|----------------|----------------|
| Crystal system                                                                                                     | monoclinic     | cubic          |
| Space group                                                                                                        | <i>I2/m</i>    | <i>Fm-3m</i>   |
| <i>a</i> / Å                                                                                                       | 9.9367(13)     | 13.9355(2)     |
| <i>b</i> / Å                                                                                                       | 9.6137(13)     | 13.9355(2)     |
| <i>c</i> / Å                                                                                                       | 13.8856(15)    | 13.9355(2)     |
| $\alpha$ / °                                                                                                       | 90             | 90             |
| $\beta$ / °                                                                                                        | 95.863(10)     | 90             |
| $\gamma$ / °                                                                                                       | 90             | 90             |
| <i>V</i> / Å <sup>3</sup>                                                                                          | 1319.5(3)      | 2706.25(12)    |
| <i>Z</i>                                                                                                           | 2              | 2              |
| <i>D</i> <sub>calc</sub> / g·cm <sup>-3</sup>                                                                      | 2.081          | 1.975          |
| $\mu$ / mm <sup>-1</sup>                                                                                           | 4.502          | 4.388          |
| <i>F</i> (000)                                                                                                     | 808.0          | 1528.0         |
| $\theta$ range / °                                                                                                 | 4.816–49.98    | 5.062–62.68    |
| Reflns collected                                                                                                   | 4111           | 2583           |
| Independent reflns ( <i>R</i> <sub>int</sub> )                                                                     | 1226 (0.0538)  | 256 (0.0124)   |
| no. parameters                                                                                                     | 131            | 26             |
| <i>R</i> <sub>1</sub> <sup>[a]</sup> , <i>wR</i> <sub>2</sub> <sup>[b]</sup> [ <i>I</i> > 2 $\sigma$ ( <i>I</i> )] | 0.2346, 0.5006 | 0.0375, 0.1011 |
| <i>R</i> <sub>1</sub> , <i>wR</i> <sub>2</sub> [all data]                                                          | 0.2428, 0.5148 | 0.0375, 0.1011 |
| GOF                                                                                                                | 2.542          | 1.175          |
| $\Delta\rho$ <sup>[c]</sup> / e·Å <sup>-3</sup>                                                                    | 24.41, -3.56   | 1.09, -1.03    |
| CCDC                                                                                                               | 2310567        | 2310568        |

|                                               |                                                                                                 |
|-----------------------------------------------|-------------------------------------------------------------------------------------------------|
| <b>2</b>                                      | 293 K                                                                                           |
| Formula                                       | Br <sub>4</sub> C <sub>16</sub> Eu <sub>2</sub> N <sub>16</sub> O <sub>36</sub> Rb <sub>2</sub> |
| Formula weight                                | 1786.80                                                                                         |
| <i>T</i> / K                                  | 293(2)                                                                                          |
| Crystal system                                | cubic                                                                                           |
| Space group                                   | <i>Fm-3m</i>                                                                                    |
| <i>a</i> / Å                                  | 13.9993(6)                                                                                      |
| <i>b</i> / Å                                  | 13.9993(6)                                                                                      |
| <i>c</i> / Å                                  | 13.9993(6)                                                                                      |
| $\alpha$ / °                                  | 90                                                                                              |
| $\beta$ / °                                   | 90                                                                                              |
| $\gamma$ / °                                  | 90                                                                                              |
| <i>V</i> / Å <sup>3</sup>                     | 2743.6(4)                                                                                       |
| <i>Z</i>                                      | 2                                                                                               |
| <i>D</i> <sub>calc</sub> / g·cm <sup>-3</sup> | 2.163                                                                                           |
| $\mu$ / mm <sup>-1</sup>                      | 7.047                                                                                           |
| <i>F</i> (000)                                | 1672.0                                                                                          |
| $\theta$ range / °                            | 5.04–62.694                                                                                     |



|                                                 |                |
|-------------------------------------------------|----------------|
| Reflns collected                                | 2703           |
| Independent reflns ( $R_{\text{int}}$ )         | 256 (0.0187)   |
| no. parameters                                  | 23             |
| $R_1^{[a]}$ , $wR_2^{[b]}$ [ $I > 2\sigma(I)$ ] | 0.0434, 0.1303 |
| $R_1$ , $wR_2$ [all data]                       | 0.0438, 0.1305 |
| GOF                                             | 1.169          |
| $\Delta\rho^{[c]}$ / e·Å <sup>-3</sup>          | 0.90, -0.95    |
| CCDC                                            | 2310569        |

|                                                 |                                                                                   |
|-------------------------------------------------|-----------------------------------------------------------------------------------|
| <b>3</b>                                        | 311 K                                                                             |
| Formula                                         | C <sub>8</sub> H <sub>22</sub> EuI <sub>2</sub> N <sub>8</sub> O <sub>18</sub> Rb |
| Formula weight                                  | 1009.56                                                                           |
| $T$ / K                                         | 311.15                                                                            |
| Crystal system                                  | triclinic                                                                         |
| Space group                                     | $P-1$                                                                             |
| $a$ / Å                                         | 9.6573(3)                                                                         |
| $b$ / Å                                         | 14.1326(4)                                                                        |
| $c$ / Å                                         | 17.3712(5)                                                                        |
| $\alpha$ / °                                    | 112.633(3)                                                                        |
| $\beta$ / °                                     | 104.666(3)                                                                        |
| $\gamma$ / °                                    | 93.116(2)                                                                         |
| $V$ / Å <sup>3</sup>                            | 2086.18(12)                                                                       |
| $Z$                                             | 3                                                                                 |
| $D_{\text{calc}}$ / g·cm <sup>-3</sup>          | 2.411                                                                             |
| $\mu$ / mm <sup>-1</sup>                        | 6.300                                                                             |
| $F(000)$                                        | 1428.0                                                                            |
| $\theta$ range / °                              | 4.424–49.99                                                                       |
| Reflns collected                                | 17253                                                                             |
| Independent reflns ( $R_{\text{int}}$ )         | 7086 (0.0275)                                                                     |
| no. parameters                                  | 526                                                                               |
| $R_1^{[a]}$ , $wR_2^{[b]}$ [ $I > 2\sigma(I)$ ] | 0.0497, 0.1402                                                                    |
| $R_1$ , $wR_2$ [all data]                       | 0.0578, 0.1470                                                                    |
| GOF                                             | 1.019                                                                             |
| $\Delta\rho^{[c]}$ / e·Å <sup>-3</sup>          | 3.99, -2.41                                                                       |
| CCDC                                            | 2314668                                                                           |

<sup>[a]</sup>  $R_1 = \Sigma||F_o| - |F_c||/\Sigma|F_o|$ . <sup>[b]</sup>  $wR_2 = [\Sigma w(F_o^2 - F_c^2)^2/\Sigma w(F_o^2)^2]^{1/2}$ . <sup>[c]</sup> Maximum and minimum residual electron density.

**Table S4.** Selected bond lengths [Å] and angles [°] for **1**, **2** and **3**.  
1–193 K

|                                          |             |                                          |             |
|------------------------------------------|-------------|------------------------------------------|-------------|
| Eu1–O6                                   | 2.45 (5)    | Rb1–O3                                   | 2.66 (6)    |
| Eu1–O1                                   | 2.43 (5)    | Rb1–O4                                   | 2.67 (4)    |
| Eu1–O2                                   | 2.43 (5)    | O6 <sup>i</sup> –Eu1–O6 <sup>iii</sup>   | 34 (3)      |
| O6 <sup>iii</sup> –Eu1–O6 <sup>ii</sup>  | 180.00 (19) | O3 <sup>viii</sup> –Rb1–O4 <sup>x</sup>  | 97.1 (11)   |
| O6 <sup>i</sup> –Eu1–O6 <sup>ii</sup>    | 146 (3)     | O3 <sup>ix</sup> –Rb1–O4 <sup>viii</sup> | 97.1 (11)   |
| O6 <sup>i</sup> –Eu1–O6 <sup>iv</sup>    | 179.99 (14) | O3–Rb1–O4                                | 82.9 (11)   |
| O6 <sup>ii</sup> –Eu1–O6 <sup>iv</sup>   | 34 (3)      | O3 <sup>x</sup> –Rb1–O4                  | 97.1 (11)   |
| O6 <sup>iii</sup> –Eu1–O6 <sup>iv</sup>  | 146 (3)     | O3 <sup>ix</sup> –Rb1–O4                 | 97.1 (11)   |
| O1 <sup>vii</sup> –Eu1–O6 <sup>iii</sup> | 139.2 (16)  | O4 <sup>x</sup> –Rb1–O4                  | 180.00 (13) |
| O1–Eu1–O6 <sup>iv</sup>                  | 139.2 (16)  | O4 <sup>x</sup> –Rb1–O4 <sup>viii</sup>  | 180.00 (13) |
| O1 <sup>v</sup> –Eu1–O6 <sup>iii</sup>   | 40.8 (16)   | O1 <sup>v</sup> –Eu1–O6 <sup>iv</sup>    | 110 (2)     |
| O1–Eu1–O6 <sup>i</sup>                   | 40.8 (16)   | O1–Eu1–O6 <sup>ii</sup>                  | 110 (2)     |
| O1–Eu1–O6 <sup>iii</sup>                 | 70 (2)      | O1 <sup>vi</sup> –Eu1–O6 <sup>iii</sup>  | 110 (2)     |
| O1 <sup>vi</sup> –Eu1–O6 <sup>i</sup>    | 139.2 (16)  | O1–Eu1–O1 <sup>vii</sup>                 | 91 (3)      |
| O1 <sup>vi</sup> –Eu1–O6 <sup>iv</sup>   | 40.8 (16)   | O1 <sup>vi</sup> –Eu1–O1 <sup>v</sup>    | 91 (3)      |
| O1 <sup>v</sup> –Eu1–O6 <sup>i</sup>     | 70 (2)      | O1–Eu1–O1 <sup>v</sup>                   | 89 (3)      |
| O1 <sup>vii</sup> –Eu1–O6 <sup>iv</sup>  | 70 (2)      | O1 <sup>vi</sup> –Eu1–O1 <sup>vii</sup>  | 89 (3)      |
| O1 <sup>vii</sup> –Eu1–O6 <sup>ii</sup>  | 40.8 (16)   | O1 <sup>v</sup> –Eu1–O1 <sup>vii</sup>   | 180 (2)     |
| O1 <sup>vii</sup> –Eu1–O6 <sup>i</sup>   | 110 (2)     | O1–Eu1–O1 <sup>vi</sup>                  | 180.0 (18)  |
| O1 <sup>vi</sup> –Eu1–O6 <sup>ii</sup>   | 70 (2)      | O2 <sup>vii</sup> –Eu1–O6 <sup>i</sup>   | 71 (2)      |
| O1 <sup>v</sup> –Eu1–O6 <sup>ii</sup>    | 139.2 (16)  | O2 <sup>vii</sup> –Eu1–O6 <sup>ii</sup>  | 87.8 (16)   |
| O2 <sup>vi</sup> –Eu1–O6 <sup>i</sup>    | 92.2 (16)   | O2–Eu1–O6 <sup>iii</sup>                 | 109 (2)     |
| O2 <sup>v</sup> –Eu1–O6 <sup>iii</sup>   | 87.8 (16)   | O2 <sup>v</sup> –Eu1–O2 <sup>vi</sup>    | 103 (3)     |
| O2 <sup>v</sup> –Eu1–O6 <sup>i</sup>     | 109 (2)     | O2–Eu1–O2 <sup>v</sup>                   | 77 (3)      |
| O2–Eu1–O1 <sup>vi</sup>                  | 132.2 (18)  | O3–Rb1–O3 <sup>viii</sup>                | 90 (2)      |
| O2–Eu1–O1                                | 47.8 (18)   | O3 <sup>x</sup> –Rb1–O3 <sup>viii</sup>  | 90 (2)      |

|                                                                                                                                                                                                                                                                                                                   |             |                                             |             |
|-------------------------------------------------------------------------------------------------------------------------------------------------------------------------------------------------------------------------------------------------------------------------------------------------------------------|-------------|---------------------------------------------|-------------|
| O3 <sup>viii</sup> -Rb1-O4                                                                                                                                                                                                                                                                                        | 82.9 (11)   | O3-Rb1-O4 <sup>viii</sup>                   | 82.9 (11)   |
| Symmetry codes: (i) $x-1/2, y-1/2, z-1/2$ ; (ii) $-x+3/2, y-1/2, -z+5/2$ ; (iii) $x-1/2, -y+5/2, z-1/2$ ; (iv) $-x+3/2, -y+5/2, -z+5/2$ ; (v) $x, -y+2, z$ ; (vi) $-x+1, -y+2, -z+2$ ; (vii) $-x+1, y, -z+2$ ; (viii) $x, -y+3, z$ ; (ix) $-x+2, y, -z+2$ ; (x) $-x+2, -y+3, -z+2$ ; (xi) $x+1/2, y+1/2, z+1/2$ . |             |                                             |             |
| <b>1-293 K</b>                                                                                                                                                                                                                                                                                                    |             |                                             |             |
| Rb1-O1                                                                                                                                                                                                                                                                                                            | 2.760 (18)  | Eu1-O2                                      | 2.531 (8)   |
| O1-Rb1-O1 <sup>iii</sup>                                                                                                                                                                                                                                                                                          | 90.0        | O2 <sup>xvi</sup> -Eu1-O2 <sup>xix</sup>    | 67.79 (17)  |
| O1 <sup>iv</sup> -Rb1-O1 <sup>i</sup>                                                                                                                                                                                                                                                                             | 90.000 (3)  | O2 <sup>xiv</sup> -Eu1-O2 <sup>xxi</sup>    | 80.05 (18)  |
| O1 <sup>iv</sup> -Rb1-O1 <sup>v</sup>                                                                                                                                                                                                                                                                             | 90.0        | O2 <sup>xxii</sup> -Eu1-O2 <sup>xix</sup>   | 40.9 (5)    |
| O1-Rb1-O1 <sup>iv</sup>                                                                                                                                                                                                                                                                                           | 180.0       | O2 <sup>xvi</sup> -Eu1-O2 <sup>xxi</sup>    | 99.95 (18)  |
| O1-Rb1-O1 <sup>v</sup>                                                                                                                                                                                                                                                                                            | 90.000 (1)  | O2-Eu1-O2 <sup>xv</sup>                     | 145.8 (3)   |
| O1 <sup>iii</sup> -Rb1-O1 <sup>iv</sup>                                                                                                                                                                                                                                                                           | 90.000 (1)  | O2 <sup>xviii</sup> -Eu1-O2 <sup>xxi</sup>  | 67.79 (17)  |
| O1 <sup>iii</sup> -Rb1-O1 <sup>i</sup>                                                                                                                                                                                                                                                                            | 90.000 (3)  | O2 <sup>xx</sup> -Eu1-O2 <sup>xv</sup>      | 99.95 (18)  |
| O1-Rb1-O1 <sup>ii</sup>                                                                                                                                                                                                                                                                                           | 90.000 (3)  | O2 <sup>xx</sup> -Eu1-O2 <sup>xxi</sup>     | 112.21 (17) |
| O1 <sup>ii</sup> -Rb1-O1 <sup>i</sup>                                                                                                                                                                                                                                                                             | 180.0       | O2 <sup>xvii</sup> -Eu1-O2 <sup>xv</sup>    | 112.21 (17) |
| O1 <sup>iii</sup> -Rb1-O1 <sup>ii</sup>                                                                                                                                                                                                                                                                           | 90.000 (1)  | O2-Eu1-O2 <sup>xxii</sup>                   | 67.79 (17)  |
| O1 <sup>iii</sup> -Rb1-O1 <sup>v</sup>                                                                                                                                                                                                                                                                            | 180.0       | O2 <sup>xxii</sup> -Eu1-O2 <sup>xvii</sup>  | 34.2 (3)    |
| O1 <sup>iv</sup> -Rb1-O1 <sup>ii</sup>                                                                                                                                                                                                                                                                            | 90.0        | O2 <sup>xiv</sup> -Eu1-O2 <sup>xxii</sup>   | 99.95 (18)  |
| O1 <sup>ii</sup> -Rb1-O1 <sup>v</sup>                                                                                                                                                                                                                                                                             | 90.000 (2)  | O2-Eu1-O2 <sup>xii</sup>                    | 180.0       |
| O1-Rb1-O1 <sup>i</sup>                                                                                                                                                                                                                                                                                            | 90.0        | O2 <sup>xvi</sup> -Eu1-O2 <sup>xxii</sup>   | 80.05 (18)  |
| O1 <sup>i</sup> -Rb1-O1 <sup>v</sup>                                                                                                                                                                                                                                                                              | 90.000 (2)  | O2 <sup>xvi</sup> -Eu1-O2 <sup>xii</sup>    | 139.1 (5)   |
| O2 <sup>xx</sup> -Eu1-O2 <sup>xxii</sup>                                                                                                                                                                                                                                                                          | 67.79 (17)  | O2 <sup>xviii</sup> -Eu1-O2 <sup>xxii</sup> | 112.21 (17) |
| O2 <sup>xxi</sup> -Eu1-O2 <sup>xxii</sup>                                                                                                                                                                                                                                                                         | 180.0       | O2 <sup>xiv</sup> -Eu1-O2 <sup>xix</sup>    | 112.21 (17) |
| O2 <sup>xvii</sup> -Eu1-O2 <sup>xii</sup>                                                                                                                                                                                                                                                                         | 99.95 (18)  | O2 <sup>xvi</sup> -Eu1-O2 <sup>xiii</sup>   | 112.21 (17) |
| O2 <sup>xiv</sup> -Eu1-O2 <sup>xiii</sup>                                                                                                                                                                                                                                                                         | 67.79 (17)  | O2 <sup>xviii</sup> -Eu1-O2 <sup>xix</sup>  | 99.95 (18)  |
| O2 <sup>xviii</sup> -Eu1-O2 <sup>xiii</sup>                                                                                                                                                                                                                                                                       | 40.9 (5)    | O2 <sup>xxi</sup> -Eu1-O2 <sup>xix</sup>    | 139.1 (5)   |
| O2 <sup>xx</sup> -Eu1-O2 <sup>xiii</sup>                                                                                                                                                                                                                                                                          | 139.1 (5)   | O2 <sup>xii</sup> -Eu1-O2 <sup>xix</sup>    | 145.8 (3)   |
| O2 <sup>xiii</sup> -Eu1-O2 <sup>xix</sup>                                                                                                                                                                                                                                                                         | 112.21 (17) | O2 <sup>xiv</sup> -Eu1-O2 <sup>xv</sup>     | 67.79 (17)  |

|                                            |             |                                             |             |
|--------------------------------------------|-------------|---------------------------------------------|-------------|
| O2 <sup>xxi</sup> -Eu1-O2 <sup>xiii</sup>  | 34.2 (3)    | O2 <sup>xxi</sup> -Eu1-O2 <sup>xv</sup>     | 40.9 (5)    |
| O2-Eu1-O2 <sup>xvii</sup>                  | 80.05 (18)  | O2 <sup>xiii</sup> -Eu1-O2 <sup>xv</sup>    | 67.79 (17)  |
| O2 <sup>xviii</sup> -Eu1-O2 <sup>xv</sup>  | 80.05 (18)  | O2 <sup>xviii</sup> -Eu1-O2 <sup>xvii</sup> | 139.1 (5)   |
| O2 <sup>xiv</sup> -Eu1-O2 <sup>xvii</sup>  | 112.21 (17) | O2 <sup>xii</sup> -Eu1-O2 <sup>xv</sup>     | 34.2 (3)    |
| O2-Eu1-O2 <sup>xiv</sup>                   | 139.1 (5)   | O2-Eu1-O2 <sup>xiii</sup>                   | 99.95 (18)  |
| O2 <sup>xix</sup> -Eu1-O2 <sup>xv</sup>    | 180.0       | O2 <sup>xx</sup> -Eu1-O2 <sup>xix</sup>     | 80.05 (18)  |
| O2 <sup>xx</sup> -Eu1-O2 <sup>xvii</sup>   | 40.9 (5)    | O2-Eu1-O2 <sup>xix</sup>                    | 34.2 (3)    |
| O2 <sup>xxi</sup> -Eu1-O2 <sup>xvii</sup>  | 145.8 (3)   | O2 <sup>xvi</sup> -Eu1-O2 <sup>xviii</sup>  | 145.8 (3)   |
| O2-Eu1-O2 <sup>xvi</sup>                   | 40.9 (5)    | O2-Eu1-O2 <sup>xx</sup>                     | 67.79 (17)  |
| O2 <sup>xxi</sup> -Eu1-O2 <sup>xii</sup>   | 67.79 (17)  | O2 <sup>xxii</sup> -Eu1-O2 <sup>xv</sup>    | 139.1 (5)   |
| O2 <sup>xiv</sup> -Eu1-O2 <sup>xvi</sup>   | 180.0       | O2 <sup>xviii</sup> -Eu1-O2 <sup>xx</sup>   | 180.0       |
| O2 <sup>xvi</sup> -Eu1-O2 <sup>xv</sup>    | 112.21 (17) | O2 <sup>xiii</sup> -Eu1-O2 <sup>xii</sup>   | 80.05 (18)  |
| O2-Eu1-O2 <sup>xviii</sup>                 | 112.21 (17) | O2-Eu1-O2 <sup>xxi</sup>                    | 112.21 (17) |
| O2 <sup>xiv</sup> -Eu1-O2 <sup>xii</sup>   | 40.9 (5)    | O2 <sup>xviii</sup> -Eu1-O2 <sup>xii</sup>  | 67.79 (17)  |
| O2 <sup>xiv</sup> -Eu1-O2 <sup>xx</sup>    | 145.8 (3)   | O2 <sup>xvi</sup> -Eu1-O2 <sup>xx</sup>     | 34.2 (3)    |
| O2 <sup>xiii</sup> -Eu1-O2 <sup>xvii</sup> | 180.0       |                                             |             |

Symmetry codes: (i)  $-z+1, -x+1, -y+1$ ; (ii)  $z, x, y$ ; (iii)  $-y+1, -z+1, -x+1$ ; (iv)  $-x+1, -y+1, -z+1$ ; (v)  $y, z, x$ ; (vi)  $y+1/2, z, -x+3/2$ ; (vii)  $-x+3/2, y+1/2, z$ ; (viii)  $-z+1, x-1/2, -y+1/2$ ; (ix)  $-y+1/2, -z+1, x-1/2$ ; (x)  $z, -x+3/2, y+1/2$ ; (xi)  $x-1/2, -y+1/2, -z+1$ ; (xii)  $-x+1, -y+1, -z+2$ ; (xiii)  $-z+3/2, -y+1, x+1/2$ ; (xiv)  $x, -z+3/2, -y+3/2$ ; (xv)  $-y+1, -x+1, -z+2$ ; (xvi)  $-x+1, z-1/2, y+1/2$ ; (xvii)  $z-1/2, y, -x+3/2$ ; (xviii)  $-y+1, -z+3/2, -x+3/2$ ; (xix)  $y, x, z$ ; (xx)  $y, z-1/2, x+1/2$ ; (xxi)  $-z+3/2, -x+1, -y+3/2$ ; (xxii)  $z-1/2, x, y+1/2$ ; (xxiii)  $x, -y+1/2, -z+3/2$ ; (xxiv)  $-x+3/2, y, -z+3/2$ ; (xxv)  $-x+3/2, -y+1/2, z$ ; (xxvi)  $-y+1, -x+1, z$ ; (xxvii)  $-z+3/2, -x+1, y+1/2$ ; (xxviii)  $-y+1, z-1/2, -x+3/2$ ; (xxix)  $-x+1, -y+1, z$ ; (xxx)  $x+1/2, y-1/2, z$ .

## 2-293 K

|                                          |            |                                          |            |
|------------------------------------------|------------|------------------------------------------|------------|
| Eu1-O2                                   | 2.556 (10) | Rb1-O1                                   | 2.824 (16) |
| O2 <sup>i</sup> -Eu1-O2 <sup>iv</sup>    | 180.0      | O2 <sup>i</sup> -Eu1-O2 <sup>viii</sup>  | 34.3 (4)   |
| O2 <sup>ix</sup> -Eu1-O2 <sup>v</sup>    | 90.000 (2) | O2 <sup>i</sup> -Eu1-O2 <sup>ii</sup>    | 40.8 (6)   |
| O2 <sup>viii</sup> -Eu1-O2 <sup>ix</sup> | 112.2 (2)  | O2 <sup>iv</sup> -Eu1-O2 <sup>viii</sup> | 145.7 (4)  |

---

|                                           |           |                                           |            |
|-------------------------------------------|-----------|-------------------------------------------|------------|
| O2 <sup>i</sup> -Eu1-O2 <sup>vi</sup>     | 67.8 (2)  | O2 <sup>xii</sup> -Eu1-O2 <sup>ii</sup>   | 34.3 (4)   |
| O2 <sup>x</sup> -Eu1-O2 <sup>ii</sup>     | 100.0 (2) | O2 <sup>vi</sup> -Eu1-O2 <sup>viii</sup>  | 40.8 (6)   |
| O2 <sup>iv</sup> -Eu1-O2 <sup>vi</sup>    | 112.2 (2) | O2 <sup>vii</sup> -Eu1-O2 <sup>ix</sup>   | 112.2 (2)  |
| O2 <sup>iv</sup> -Eu1-O2 <sup>v</sup>     | 49.2 (6)  | O2 <sup>i</sup> -Eu1-O2 <sup>x</sup>      | 112.2 (2)  |
| O2 <sup>iii</sup> -Eu1-O2 <sup>v</sup>    | 100.0 (2) | O2 <sup>i</sup> -Eu1-O2 <sup>xi</sup>     | 112.2 (2)  |
| O2 <sup>iv</sup> -Eu1-O2 <sup>x</sup>     | 67.8 (2)  | O2 <sup>iv</sup> -Eu1-O2 <sup>ix</sup>    | 40.8 (6)   |
| O2 <sup>iii</sup> -Eu1-O2 <sup>xii</sup>  | 139.2 (6) | O2 <sup>iv</sup> -Eu1-O2 <sup>xi</sup>    | 67.8 (2)   |
| O2 <sup>vi</sup> -Eu1-O2 <sup>x</sup>     | 180.0     | O2 <sup>xi</sup> -Eu1-O2 <sup>ix</sup>    | 34.3 (4)   |
| O2 <sup>vi</sup> -Eu1-O2 <sup>ii</sup>    | 80.0 (2)  | O2 <sup>vi</sup> -Eu1-O2 <sup>xi</sup>    | 112.2 (2)  |
| O2 <sup>viii</sup> -Eu1-O2 <sup>x</sup>   | 139.2 (6) | O2 <sup>ii</sup> -Eu1-O2 <sup>ix</sup>    | 180.0      |
| O2 <sup>iii</sup> -Eu1-O2 <sup>ii</sup>   | 112.2 (2) | O2 <sup>viii</sup> -Eu1-O2 <sup>xi</sup>  | 100.0 (2)  |
| O2 <sup>x</sup> -Eu1-O2 <sup>v</sup>      | 67.8 (2)  | O2 <sup>iv</sup> -Eu1-O2 <sup>ii</sup>    | 139.2 (6)  |
| O2 <sup>x</sup> -Eu1-O2 <sup>xi</sup>     | 67.8 (2)  | O2 <sup>viii</sup> -Eu1-O2 <sup>iii</sup> | 112.2 (2)  |
| O2 <sup>xii</sup> -Eu1-O2 <sup>v</sup>    | 67.8 (2)  | O2 <sup>viii</sup> -Eu1-O2 <sup>ii</sup>  | 67.8 (2)   |
| O2 <sup>i</sup> -Eu1-O2 <sup>iii</sup>    | 100.0 (2) | O2 <sup>x</sup> -Eu1-O2 <sup>iii</sup>    | 34.3 (4)   |
| O2 <sup>xi</sup> -Eu1-O2 <sup>xii</sup>   | 180.0     | O2 <sup>xi</sup> -Eu1-O2 <sup>ii</sup>    | 145.7 (4)  |
| O2 <sup>iv</sup> -Eu1-O2 <sup>iii</sup>   | 80.0 (2)  | O2 <sup>xi</sup> -Eu1-O2 <sup>iii</sup>   | 40.8 (6)   |
| O2 <sup>vii</sup> -Eu1-O2 <sup>xii</sup>  | 40.8 (6)  | O2 <sup>vii</sup> -Eu1-O2 <sup>ii</sup>   | 67.8 (2)   |
| O2 <sup>vi</sup> -Eu1-O2 <sup>iii</sup>   | 145.7 (4) | O2 <sup>i</sup> -Eu1-O2 <sup>vii</sup>    | 80.0 (2)   |
| O2 <sup>i</sup> -Eu1-O2 <sup>ix</sup>     | 139.2 (6) | O2 <sup>xii</sup> -Eu1-O2 <sup>ix</sup>   | 145.7 (4)  |
| O2 <sup>iv</sup> -Eu1-O2 <sup>vii</sup>   | 100.0 (2) | O2 <sup>xi</sup> -Eu1-O2 <sup>vii</sup>   | 139.2 (6)  |
| O2 <sup>vi</sup> -Eu1-O2 <sup>ix</sup>    | 100.0 (2) | O2 <sup>i</sup> -Eu1-O2 <sup>v</sup>      | 130.8 (6)  |
| O2 <sup>vi</sup> -Eu1-O2 <sup>vii</sup>   | 34.3 (4)  | O2 <sup>iii</sup> -Eu1-O2 <sup>vii</sup>  | 180.0      |
| O2 <sup>x</sup> -Eu1-O2 <sup>ix</sup>     | 80.0 (2)  | O2 <sup>viii</sup> -Eu1-O2 <sup>v</sup>   | 145.7 (4)  |
| O2 <sup>viii</sup> -Eu1-O2 <sup>vii</sup> | 67.8 (2)  | O2 <sup>i</sup> -Eu1-O2 <sup>xii</sup>    | 67.8 (2)   |
| O2 <sup>iii</sup> -Eu1-O2 <sup>ix</sup>   | 67.8 (2)  | O2 <sup>xi</sup> -Eu1-O2 <sup>v</sup>     | 112.2 (2)  |
| O2 <sup>x</sup> -Eu1-O2 <sup>vii</sup>    | 145.7 (4) | O2 <sup>iv</sup> -Eu1-O2 <sup>xii</sup>   | 112.2 (2)  |
| O2 <sup>vii</sup> -Eu1-O2 <sup>v</sup>    | 80.0 (2)  | O1-Rb1-O1 <sup>xv</sup>                   | 90.000 (1) |

---

|                                           |            |                                            |            |
|-------------------------------------------|------------|--------------------------------------------|------------|
| O2 <sup>vi</sup> -Eu1-O2 <sup>xii</sup>   | 67.8 (2)   | O1 <sup>xvi</sup> -Rb1-O1 <sup>xvii</sup>  | 90.000 (1) |
| O2 <sup>ii</sup> -Eu1-O2 <sup>v</sup>     | 90.000 (2) | O1 <sup>xvi</sup> -Rb1-O1 <sup>xiii</sup>  | 90.000 (1) |
| O2 <sup>viii</sup> -Eu1-O2 <sup>xii</sup> | 80.0 (2)   | O1-Rb1-O1 <sup>xvi</sup>                   | 90.000 (3) |
| O2 <sup>x</sup> -Eu1-O2 <sup>xii</sup>    | 112.2 (2)  | O1-Rb1-O1 <sup>xiii</sup>                  | 90.000 (1) |
| O2 <sup>vi</sup> -Eu1-O2 <sup>v</sup>     | 112.2 (2)  | O1 <sup>xv</sup> -Rb1-O1 <sup>xvi</sup>    | 180.0      |
| O1 <sup>xv</sup> -Rb1-O1 <sup>xvii</sup>  | 90.000 (1) | O1 <sup>xiv</sup> -Rb1-O1 <sup>xiii</sup>  | 90.000 (1) |
| O1-Rb1-O1 <sup>xiv</sup>                  | 180.0      | O1-Rb1-O1 <sup>xvii</sup>                  | 90.0       |
| O1 <sup>xiv</sup> -Rb1-O1 <sup>xvii</sup> | 90.000 (1) | O1 <sup>xvii</sup> -Rb1-O1 <sup>xiii</sup> | 180.0      |
| O1 <sup>xv</sup> -Rb1-O1 <sup>xiv</sup>   | 90.000 (2) | O1 <sup>xvi</sup> -Rb1-O1 <sup>xiv</sup>   | 90.000 (1) |
| O1 <sup>xv</sup> -Rb1-O1 <sup>xiii</sup>  | 90.000 (1) |                                            |            |

Symmetry codes: (i)  $-z+1, -y+2, x$ ; (ii)  $-y+3/2, -z+3/2, -x+1$ ; (iii)  $z, x+1/2, y-1/2$ ; (iv)  $z, y, -x+1$ ; (v)  $-z+1, y, -x+1$ ; (vi)  $x, -z+3/2, -y+3/2$ ; (vii)  $-z+1, -x+3/2, -y+3/2$ ; (viii)  $-x+1, -y+2, -z+1$ ; (ix)  $y-1/2, z+1/2, x$ ; (x)  $-x+1, z+1/2, y-1/2$ ; (xi)  $y-1/2, x+1/2, z$ ; (xii)  $-y+3/2, -x+3/2, -z+1$ ; (xiii)  $-z+1, -x+1, -y+1$ ; (xiv)  $-x+1, -y+1, -z+1$ ; (xv)  $-y+1, -z+1, -x+1$ ; (xvi)  $y, z, x$ ; (xvii)  $z, x, y$ ; (xviii)  $x, -y+1, z$ ; (xix)  $-x+1, -y+1, z$ ; (xx)  $-x+1, y, -z+1$ ; (xxi)  $-x+1, y, z$ ; (xxii)  $x, y, -z+1$ ; (xxiii)  $-x+1/2, -y+3/2, z$ ; (xxiv)  $-x+1/2, y, -z+1/2$ ; (xxv)  $x, -y+3/2, -z+1/2$ .

### 3-311 K

|           |           |                                            |           |
|-----------|-----------|--------------------------------------------|-----------|
| Eu1-O2    | 2.580 (7) | Eu2-O20                                    | 2.561 (6) |
| Eu1-O3    | 2.568 (7) | Eu2-O21                                    | 2.598 (7) |
| Eu1-O5    | 2.601 (7) | Eu2-O23                                    | 2.585 (6) |
| Eu1-O6    | 2.581 (6) | Eu2-O24                                    | 2.603 (7) |
| Eu1-O7    | 2.608 (7) | Eu2-O26                                    | 2.576 (6) |
| Eu1-O8    | 2.565 (6) | Eu2-O27                                    | 2.575 (6) |
| Rb1-O1    | 2.894 (7) | Rb2-O13                                    | 2.855 (7) |
| Rb2-O19   | 2.906 (7) | O25 <sup>ix</sup> -Rb2-O16 <sup>viii</sup> | 80.9 (3)  |
| O2-Eu1-O5 | 67.6 (2)  | O25 <sup>ix</sup> -Rb2-O19                 | 83.9 (3)  |
| O3-Eu1-O2 | 49.4 (2)  | O19-Rb2-O4 <sup>vi</sup>                   | 113.0 (2) |
| O5-Eu1-O7 | 66.9 (2)  | O19-Rb2-O9 <sup>vii</sup>                  | 108.6 (2) |
| O6-Eu1-O5 | 48.7 (2)  | O25 <sup>ix</sup> -Rb2-O4 <sup>vi</sup>    | 154.2 (2) |

---

|                           |             |                                           |           |
|---------------------------|-------------|-------------------------------------------|-----------|
| O8–Eu1–O5                 | 68.3 (2)    | O25 <sup>ix</sup> –Rb2–O9 <sup>vii</sup>  | 115.8 (3) |
| O11–Eu1–O3                | 67.6 (2)    | O1 <sup>ii</sup> –Rb1–O1                  | 180.0     |
| O12–Eu1–O2                | 111.5 (2)   | O1–Rb1–O22 <sup>v</sup>                   | 68.1 (2)  |
| O14–Eu1–O5                | 110.8 (2)   | O1–Rb1–O22 <sup>i</sup>                   | 111.9 (2) |
| O15–Eu1–O2                | 112.6 (2)   | O1 <sup>ii</sup> –Rb1–O22 <sup>v</sup>    | 111.9 (2) |
| O15–Eu1–O6                | 68.2 (2)    | O1 <sup>ii</sup> –Rb1–O22 <sup>i</sup>    | 68.1 (2)  |
| O15–Eu1–O7                | 178.9 (2)   | O10 <sup>iii</sup> –Rb1–O1                | 84.9 (3)  |
| O17–Eu1–O5                | 67.4 (2)    | O10 <sup>iv</sup> –Rb1–O1                 | 95.1 (3)  |
| O17–Eu1–O7                | 110.5 (2)   | O10 <sup>iv</sup> –Rb1–O1 <sup>ii</sup>   | 84.9 (3)  |
| O18–Eu1–O2                | 179.5 (2)   | O10 <sup>iii</sup> –Rb1–O1 <sup>ii</sup>  | 95.1 (3)  |
| O18–Eu1–O3                | 130.8 (2)   | O10 <sup>iv</sup> –Rb1–O10 <sup>iii</sup> | 180.0 (5) |
| O18–Eu1–O5                | 112.4 (2)   | O10 <sup>iii</sup> –Rb1–O22 <sup>v</sup>  | 76.5 (3)  |
| O18–Eu1–O6                | 111.6 (2)   | O10 <sup>iii</sup> –Rb1–O22 <sup>i</sup>  | 103.5 (3) |
| O20 <sup>i</sup> –Eu2–O20 | 180.0       | O10 <sup>iv</sup> –Rb1–O22 <sup>v</sup>   | 103.5 (3) |
| O20–Eu2–O21               | 49.2 (2)    | O10 <sup>iv</sup> –Rb1–O22 <sup>i</sup>   | 76.5 (3)  |
| O21–Eu2–O21 <sup>i</sup>  | 180.0       | O22 <sup>i</sup> –Rb1–O22 <sup>v</sup>    | 180.0 (3) |
| O21–Eu2–O24               | 68.0 (2)    | O4 <sup>vi</sup> –Rb2–O9 <sup>vii</sup>   | 78.5 (2)  |
| O23–Eu2–O21               | 113.6 (2)   | O13–Rb2–O4 <sup>vi</sup>                  | 89.7 (3)  |
| O23 <sup>i</sup> –Eu2–O21 | 66.4 (2)    | O13–Rb2–O9 <sup>vii</sup>                 | 167.7 (2) |
| O24–Eu2–O24 <sup>i</sup>  | 180.00 (17) | O13–Rb2–O16 <sup>viii</sup>               | 86.8 (3)  |
| O26–Eu2–O21 <sup>i</sup>  | 112.4 (2)   | O13–Rb2–O19                               | 79.2 (3)  |
| O26–Eu2–O23               | 70.8 (2)    | O13–Rb2–O25 <sup>ix</sup>                 | 73.8 (3)  |
| O26–Eu2–O21               | 67.6 (2)    | O16 <sup>viii</sup> –Rb2–O4 <sup>vi</sup> | 78.4 (3)  |
| O26–Eu2–O24               | 67.2 (2)    | O27–Eu2–O23                               | 113.9 (2) |
| O26–Eu2–O26 <sup>i</sup>  | 180.0 (4)   | O27–Eu2–O24                               | 113.2 (2) |
| O27–Eu2–O21               | 70.4 (2)    | O27–Eu2–O26                               | 49.4 (2)  |
| O27–Eu2–O27 <sup>i</sup>  | 180.0       |                                           |           |

---

Symmetry codes: (i)  $-x, -y+1, -z$ ; (ii)  $-x, -y, -z$ ; (iii)  $x-1, y, z$ ; (iv)  $-x+1, -y, -z$ ; (v)  $x, y-1, z$ ; (vi)  $-x+1, -y+1, -z+1$ ; (vii)  $x, y+1, z$ ; (viii)  $-x+2, -y+1, -z+1$ ; (ix)  $-x+1, -y+1, -z$ ; (x)  $x+1, y, z$ .

**Table S5.** Anisotropic displacement parameters ( $\text{\AA}^2 \times 10^3$ ) for **1**, **2** and **3**.

|                | $U_{11}$  | $U_{22}$  | $U_{33}$  | $U_{12}$    | $U_{13}$    | $U_{23}$   |
|----------------|-----------|-----------|-----------|-------------|-------------|------------|
| <b>1–193 K</b> |           |           |           |             |             |            |
| N1             | 0.151 (6) | 0.151 (6) | 0.151 (6) | −0.0001 (7) | 0.0154 (9)  | 0.0000 (7) |
| O3             | 0.151 (6) | 0.151 (6) | 0.151 (6) | −0.0001 (8) | 0.0153 (10) | 0.0000 (8) |
| N3             | 0.131 (7) | 0.131 (7) | 0.131 (7) | 0.0000 (8)  | 0.0134 (11) | 0.0000 (8) |
| N2             | 0.065 (5) | 0.065 (5) | 0.065 (5) | 0.000       | 0.0067 (9)  | 0.000      |
| O5             | 0.065 (5) | 0.065 (5) | 0.065 (5) | 0.0000 (7)  | 0.0067 (10) | 0.0000 (7) |
| O4             | 0.066 (5) | 0.066 (5) | 0.065 (5) | 0.000       | 0.0067 (10) | 0.000      |
| O6             | 0.065 (5) | 0.065 (5) | 0.065 (5) | 0.0000 (7)  | 0.0067 (10) | 0.0000 (7) |
| O1             | 0.151 (6) | 0.151 (6) | 0.151 (6) | −0.0001 (7) | 0.0154 (10) | 0.0000 (7) |
| O2             | 0.151 (6) | 0.151 (6) | 0.151 (6) | −0.0001 (7) | 0.0154 (10) | 0.0000 (7) |
| <b>1–293 K</b> |           |           |           |             |             |            |
| O1             | 0.104 (6) | 0.083 (5) | 0.048 (3) | 0.000       | 0.000       | −0.020 (3) |
| O2             | 0.177 (8) | 0.177 (8) | 0.073 (6) | 0.000       | 0.000       | 0.000      |
| N1             | 0.088 (4) | 0.088 (4) | 0.056 (5) | 0.000       | 0.000       | 0.000      |
| <b>2–293 K</b> |           |           |           |             |             |            |
| O1             | 0.31 (2)  | 0.033 (7) | 0.31 (2)  | 0.000       | 0.000       | 0.000      |
| O2             | 0.130 (9) | 0.062 (6) | 0.095 (8) | 0.000       | 0.000       | −0.027 (5) |
| N1             | 0.128 (9) | 0.038 (7) | 0.128 (9) | 0.000       | 0.000       | 0.000      |
| <b>3–311 K</b> |           |           |           |             |             |            |
| O1             | 0.044 (4) | 0.064 (5) | 0.061 (5) | −0.003 (4)  | −0.017 (4)  | 0.013 (4)  |
| O2             | 0.042 (4) | 0.052 (4) | 0.049 (4) | 0.006 (3)   | 0.011 (3)   | 0.016 (3)  |
| O3             | 0.045 (4) | 0.056 (4) | 0.043 (4) | 0.005 (3)   | 0.009 (3)   | 0.019 (3)  |
| O4             | 0.066 (5) | 0.070 (5) | 0.054 (4) | 0.029 (4)   | 0.042 (4)   | 0.022 (4)  |
| O5             | 0.049 (4) | 0.049 (4) | 0.042 (4) | 0.015 (3)   | 0.018 (3)   | 0.020 (3)  |
| O6             | 0.049 (4) | 0.045 (4) | 0.048 (4) | 0.011 (3)   | 0.021 (3)   | 0.018 (3)  |
| O7             | 0.042 (4) | 0.041 (4) | 0.054 (4) | 0.006 (3)   | 0.011 (3)   | 0.022 (3)  |
| O8             | 0.046 (4) | 0.040 (4) | 0.047 (4) | 0.006 (3)   | 0.007 (3)   | 0.021 (3)  |
| O9             | 0.084 (6) | 0.039 (4) | 0.075 (5) | 0.006 (4)   | 0.014 (4)   | 0.037 (4)  |
| O10            | 0.107 (7) | 0.082 (6) | 0.087 (6) | 0.039 (6)   | 0.079 (6)   | 0.038 (5)  |
| O11            | 0.054 (4) | 0.044 (4) | 0.050 (4) | 0.012 (3)   | 0.023 (3)   | 0.021 (3)  |
| O12            | 0.058 (4) | 0.046 (4) | 0.055 (4) | 0.018 (3)   | 0.029 (3)   | 0.022 (3)  |
| O13            | 0.097 (7) | 0.041 (4) | 0.110 (7) | 0.018 (4)   | 0.026 (6)   | 0.053 (5)  |



|     |           |           |           |            |            |           |
|-----|-----------|-----------|-----------|------------|------------|-----------|
| O14 | 0.050 (4) | 0.058 (4) | 0.056 (4) | 0.013 (4)  | 0.010 (3)  | 0.034 (4) |
| O15 | 0.050 (4) | 0.045 (4) | 0.056 (4) | 0.007 (3)  | 0.010 (3)  | 0.025 (3) |
| O16 | 0.041 (4) | 0.097 (7) | 0.058 (5) | -0.004 (4) | -0.013 (4) | 0.028 (5) |
| O17 | 0.040 (4) | 0.060 (4) | 0.039 (4) | 0.002 (3)  | 0.010 (3)  | 0.015 (3) |
| O18 | 0.042 (4) | 0.048 (4) | 0.047 (4) | 0.011 (3)  | 0.013 (3)  | 0.022 (3) |
| O19 | 0.038 (4) | 0.073 (5) | 0.063 (5) | 0.012 (4)  | -0.015 (4) | 0.006 (4) |
| O20 | 0.044 (4) | 0.040 (4) | 0.034 (3) | 0.012 (3)  | 0.010 (3)  | 0.007 (3) |
| O22 | 0.114 (7) | 0.028 (4) | 0.058 (5) | 0.002 (4)  | 0.022 (5)  | 0.016 (3) |
| O23 | 0.051 (4) | 0.037 (3) | 0.033 (3) | 0.009 (3)  | 0.010 (3)  | 0.012 (3) |
| O24 | 0.054 (4) | 0.040 (4) | 0.048 (4) | 0.002 (3)  | 0.007 (3)  | 0.017 (3) |
| O25 | 0.093 (7) | 0.120 (8) | 0.064 (5) | 0.059 (6)  | 0.057 (5)  | 0.056 (5) |
| O26 | 0.056 (4) | 0.050 (4) | 0.054 (4) | 0.018 (3)  | 0.030 (3)  | 0.028 (3) |
| O27 | 0.042 (4) | 0.049 (4) | 0.047 (4) | 0.020 (3)  | 0.018 (3)  | 0.022 (3) |
| N1  | 0.056 (4) | 0.048 (4) | 0.045 (4) | 0.013 (4)  | 0.015 (3)  | 0.022 (3) |
| N2  | 0.058 (5) | 0.073 (5) | 0.050 (4) | 0.022 (4)  | 0.015 (4)  | 0.040 (4) |
| N3  | 0.042 (4) | 0.043 (4) | 0.044 (4) | 0.016 (3)  | 0.017 (3)  | 0.019 (3) |
| N4  | 0.033 (4) | 0.031 (4) | 0.034 (4) | -0.001 (3) | -0.003 (3) | 0.009 (3) |
| N5  | 0.036 (4) | 0.043 (4) | 0.028 (4) | 0.010 (3)  | 0.010 (3)  | 0.012 (3) |
| N6  | 0.040 (4) | 0.033 (4) | 0.046 (4) | 0.008 (3)  | 0.020 (4)  | 0.022 (3) |
| N7  | 0.043 (4) | 0.047 (5) | 0.042 (4) | 0.007 (4)  | 0.024 (4)  | 0.018 (4) |
| N8  | 0.047 (5) | 0.031 (4) | 0.052 (5) | 0.005 (4)  | 0.019 (4)  | 0.019 (4) |
| N9  | 0.031 (4) | 0.037 (4) | 0.033 (4) | 0.001 (3)  | -0.001 (3) | 0.016 (3) |
| N10 | 0.040 (5) | 0.029 (4) | 0.039 (4) | 0.004 (3)  | -0.003 (4) | 0.002 (3) |
| N11 | 0.058 (5) | 0.028 (4) | 0.038 (4) | 0.008 (4)  | 0.020 (4)  | 0.013 (3) |
| N12 | 0.034 (4) | 0.071 (6) | 0.035 (4) | 0.021 (4)  | 0.015 (3)  | 0.028 (4) |

$\Delta S$

$$= \int_{T_1}^{T_2} \frac{Q}{T} dT \approx \frac{\Delta H}{T} = \frac{10.6437 \text{ J} \cdot \text{g}^{-1} \times 826.68 \text{ g} \cdot \text{mol}^{-1}}{252.5 \text{ K}} = \frac{8798.93 \text{ J} \cdot \text{mol}^{-1}}{252.5 \text{ K}} \approx 34.8472 \text{ J} \cdot \text{mol}^{-1} \cdot \text{K}^{-1}$$

$$\Delta S = R \ln N$$

$$N = \exp\left(\frac{\Delta S}{R}\right) = \exp\left(\frac{34.8472 \text{ J} \cdot \text{mol}^{-1} \cdot \text{K}^{-1}}{8.314 \text{ J} \cdot \text{mol}^{-1} \cdot \text{K}^{-1}}\right) = 66.1145$$

$$\begin{aligned} \Delta S &= \int_{T_1}^{T_2} \frac{Q}{T} dT \approx \frac{\Delta H}{T} = \frac{13.4963 \text{ J} \cdot \text{g}^{-1} \times 893.41 \text{ g} \cdot \text{mol}^{-1}}{276.5 \text{ K}} = \frac{12057.73 \text{ J} \cdot \text{mol}^{-1}}{276.5 \text{ K}} \\ &\cdot \text{K}^{-1} \end{aligned}$$

$$\Delta S = R \ln N$$

$$N = \exp\left(\frac{\Delta S}{R}\right) = \exp\left(\frac{43.6084 \text{ J} \cdot \text{mol}^{-1} \cdot \text{K}^{-1}}{8.314 \text{ J} \cdot \text{mol}^{-1} \cdot \text{K}^{-1}}\right) = 189.6493$$

$$\begin{aligned} \Delta S &= \int_{T_1}^{T_2} \frac{Q}{T} dT \approx \frac{\Delta H}{T} = \frac{9.0515 \text{ J} \cdot \text{g}^{-1} \times 1009.56 \text{ g} \cdot \text{mol}^{-1}}{324.6 \text{ K}} = \frac{9138.03 \text{ J} \cdot \text{mol}^{-1}}{324.6 \text{ K}} \\ &\cdot \text{K}^{-1} \end{aligned}$$

$$\Delta S = R \ln N$$

$$N = \exp\left(\frac{\Delta S}{R}\right) = \exp\left(\frac{28.1517 \text{ J} \cdot \text{mol}^{-1} \cdot \text{K}^{-1}}{8.314 \text{ J} \cdot \text{mol}^{-1} \cdot \text{K}^{-1}}\right) = 29.5493$$

## References

1. J. J. Ma, Q. Xu, L. Ye, Q. W. Wang, Z. X. Gong, C. Shi, H. Y. Zhang and Y. Zhang, Structural phase transition and dielectric switching in an organic-inorganic hybrid rare-earth double perovskite-type compound:  $(\text{DMP})_2\text{LaRb}(\text{NO}_3)_6$  (DMP = N,N-dimethylpyrrolidinium cation), *J. Rare Earths.*, 2022, **40**, 937–941.
2. Q. Xu, L. Ye, R. M. Liao, Z. An, C. F. Wang, L. P. Miao and Y. Zhang, H/F Substitution induced large increase of  $T_c$  in a 3D hybrid rare-earth double perovskite multifunctional compound, *Chem. Eur. J.*, 2022, **28**, e202103913.
3. D. F. Li, F. Guo, X. L. He, Y. Z. Wu, X. H. Deng, K. P. Yang, and Y. X. Li, A layered hybrid rare-earth double perovskite with two continuous reversible phase transitions induced by unusual two driving gears of fan-like rotation movements, *CrystEngComm*, 2022, **24**, 8496–8502.
4. Q. Q. Jia, H. F. Lu, J. Q. Luo, Y. Y. Zhang, H. F. Ni, F. W. Zhang and Y. Zhang, Organic-inorganic rare-earth double perovskite ferroelectric with large piezoelectric response and ferroelasticity for flexible composite energy harvesters, *Small.*, 2024, **20**, 2306989.
5. C. Shi, J. J. Ma, J. Y. Jiang, M. M. Hua, Q. Xu, H. Yu, Y. Zhang and H. Y. Ye, Large piezoelectric response in hybrid rare-earth double perovskite relaxor ferroelectrics, *J. Am. Chem. Soc.*, 2020, **142**, 9634–9641.
6. Z. B. Hu, C. F. Wang, T. T. Sha, C. Shi, L. Ye, H. Y. Ye, Y. Song, Y. M. You and Y.

- Zhang, An effective strategy of introducing chirality to achieve multifunctionality in rare-earth double perovskite ferroelectrics, *Small Methods*, 2022, **6**, 2200421.
7. C. F. Wang, C. Shi, A. Y. Zheng, Y. L. Wu, L. Ye, N. Wang, H. Y. Ye, M. J. Ju, P. F. Duan, J. L. Wang and Y. Zhang, Achieving circularly polarized luminescence and large piezoelectric response in hybrid rare-earth double perovskite by a chirality induction strategy, *Mater. Horiz.*, 2022, **9**, 2450–2459.
  8. C. Shi, L. Ye, Z. X. Gong, J. J. Ma, Q. W. Wang, J. Y. Jiang, M. M. Hua, C. F. Wang, H. Yu, Y. Zhang and H. Y. Ye, Two-dimensional organic-inorganic hybrid rare-earth double perovskite ferroelectrics, *J. Am. Chem. Soc.*, 2020, **142**, 545–551.
  9. Q. H. Zou, Z. J. Wang, L. K. Wu, Y. Feng, L. L. Jiang, J. R. Li and C. Shi, Three-Dimensional bimetallic ammonium K-Eu nitrate with a rare (6,6)-connected ion topology exhibiting structural phase transition and photoluminescence properties. *Inorg. Chem.*, 2024, doi: 10.1021/acs.inorgchem.4c01520.
  10. Z. J. Wang, L. H. Li, Y. Feng, Q. W. Wang, L. K. Wu, J. R. Li and H. Y. Ye, Synthesis, dielectric, magnetic, and photoluminescence properties of two new hybrid rare-earth double perovskites, *Front. Chem.*, 2022, **10**, 969156.
  11. M. M. Hua, L. Ye, Q. W. Wang, J. J. Ma, Z. X. Gong, Q. Xu, C. Shi and Y. Zhang, A layered hybrid rare-earth double-perovskite-type molecule-based compound with electrical and optical response properties, *J. Mater. Chem. C.*, 2020, **8**, 16349–16353.
